# Supplementary material for: Impact of Wheat Streak Mosaic Virus on Peroxisome Proliferation, Redox Reactions, and Resistance Responses in Wheat
Source: MDPI journal article supplement (doi:10.3390/ijms221910218), 2021-09-23
Supplement: s1 [file s1]

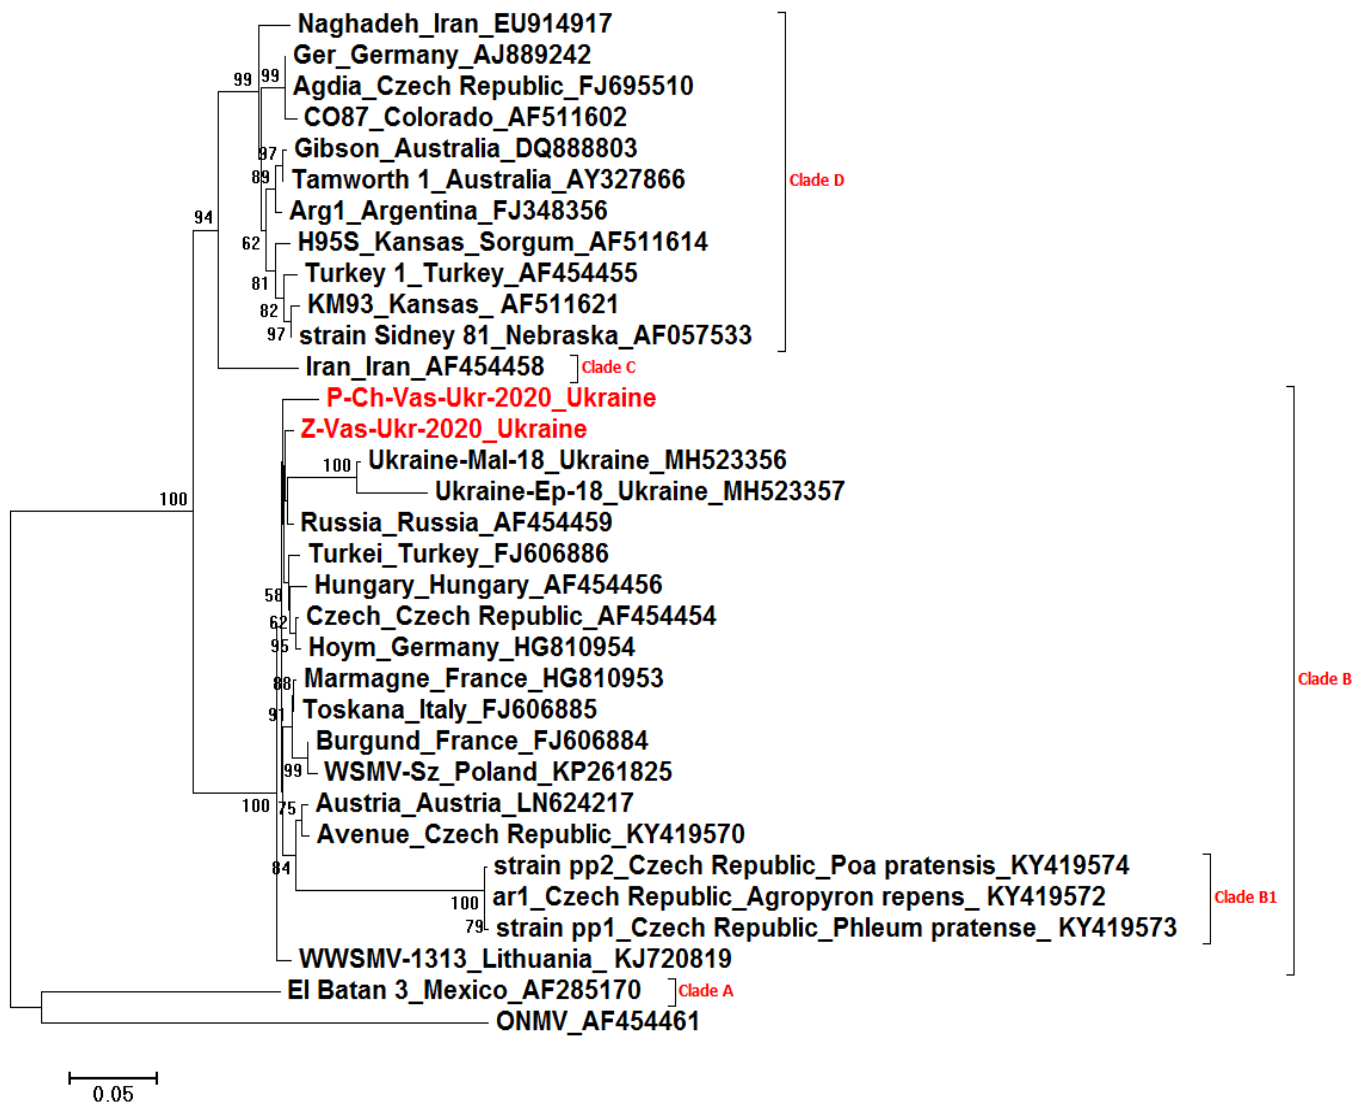

**Supplemental Figure S1.** Phylodendrogram of nucleotide sequences of WSMV isolates. Sequences isolated from wheat var. Patras (P-Ch-Vas-Ukr-2020) and from wheat var. Pamir (Z-Vas-Ukr-2020) are highlighted in red font. The tree was constructed using Neighbor-Joining method using nucleotide sequences of 676 bp coat protein gene region.
